# Supplementary material
Source: PubMed Central journal article supplement (PMC2774795)

### Supplemental file 1

Diagram illustrating the first and last clinical examination, all PET scans, time of clinical change, and post-mortem exams for every patient over time (years 1979-2004).

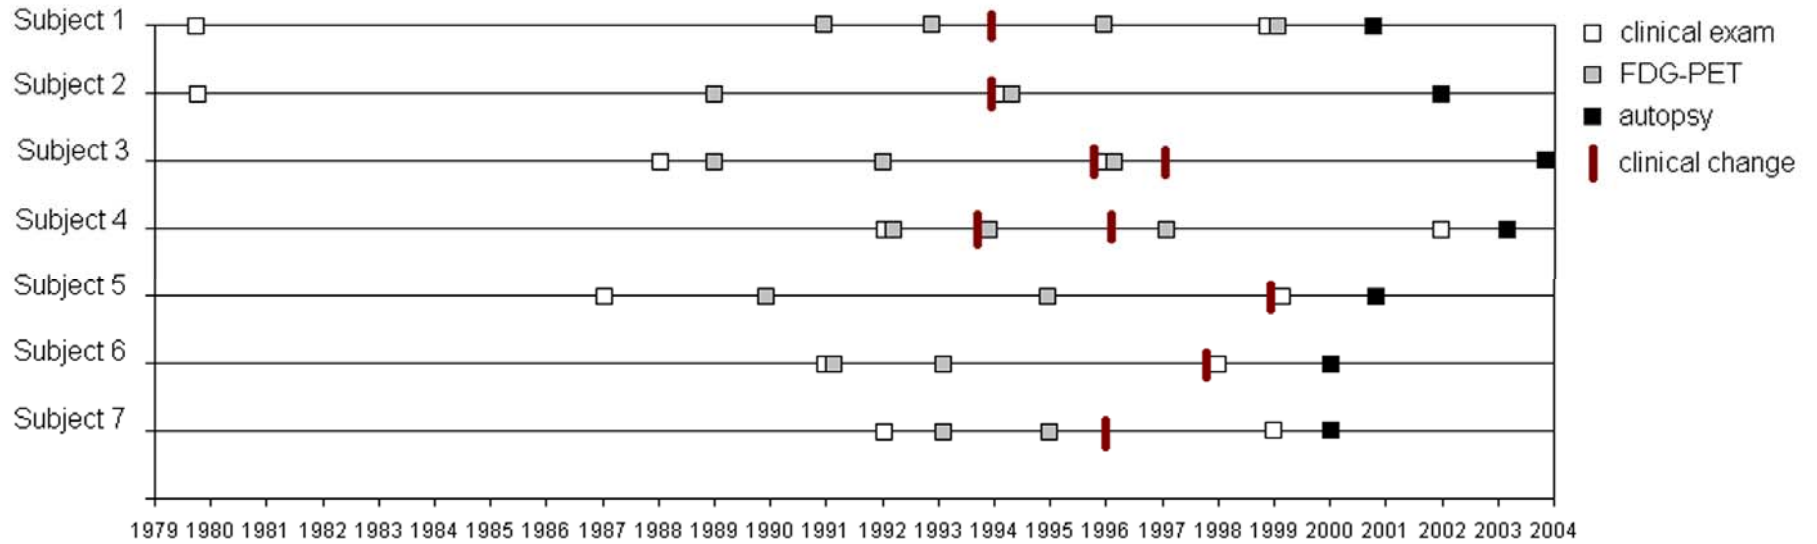

Supplement: NIHMS114177-supplement-Supplement_1.pdf [file NIHMS114177-supplement-Supplement_1.pdf]
