# Supplementary material
Source: PubMed Central journal article supplement (PMC2774795)

## Supplemental file 2

FDG-PET scans showing medial temporal lobe (MTL) hypometabolism for each subject at the last PET exam, as compared to a healthy control with normal MTL CMRglc. The scans are reformatted to a plane parallel to the plane of the temporal lobe, in a plane that runs approximately parallel to the long axis of the hippocampus at an infraorbital angulation of 20° to 25° negative to the canthomeatal plane. This axial orientation enables to examine the full anterior-posterior extent of the hippocampal region and most of the parahippocampal gyrus [Mosconi et al; Eur J Nucl Med Mol Imaging 2006; 33:210-21]. CMRglc are represented on a color-coded scale ranging from 0 to 50  $\mu\text{mol}/100 \text{ g}/\text{min}$ .

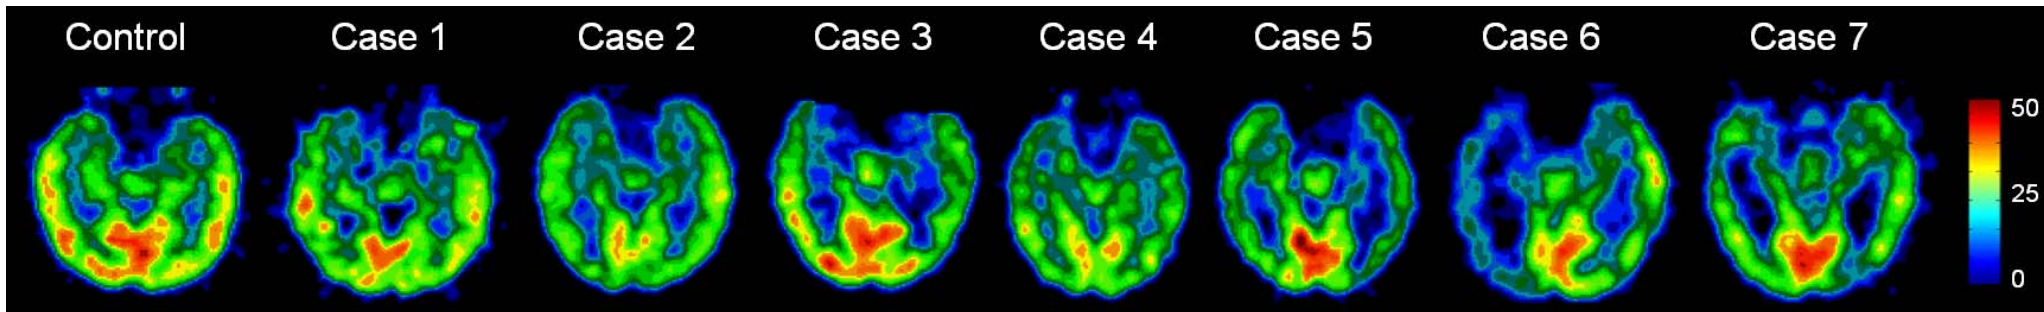

Supplement: NIHMS114177-supplement-Supplement_2.pdf [file NIHMS114177-supplement-Supplement_2.pdf]
